# Supplementary material for: Nitrogen supply forms alter adaptive properties of Moso bamboo seedlings in low phosphorus conditions
Source: Research Square preprint supplement (doi:10.21203/rs.3.rs-4817491/v1), 2024-09-02
Supplement: Supplementary file 1 [file aeb9763d2f2bd1c8edc2b28b.docx]

**Electronic Supplementary Material**

BMC Plant Biology

**Nitrogen supply forms alter adaptive properties of Moso bamboo seedlings in low phosphorus conditions**

Corresponding author: Yeqing Ying，Wenhui Shi

E-mail: yeqing@zafu.edu.cn; shiwenhui2008@163.com

**Table S1: *F* and *P* values derived from two-way ANOVA analysis for nitrogen (N) form, soil phosphorus (P) level, and their interaction on ammoniacal N content and nitrate N content in the growth media at T1.** RS reflects rhizosphere soil BS reflects bulk soil.

| **Sources** | **Value** | **Ammoniacal nitrogen content（mg·kg-1）** | | **Nitrate Nitrogen Content（mg·kg-1）** | |
| --- | --- | --- | --- | --- | --- |
| **RS** | **BS** | **RS** | **BS** |
| N | *F* | 3.802 | 15.198 | 36.076 | 43.962 |
| *p* | **0.023** | **<0.001** | **<0.001** | **<0.001** |
| P | *F* | 1.522 | 0.880 | 11.537 | 3.663 |
| *p* | 0.229 | 0.357 | **0.002** | 0.068 |
| N*P | *F* | 5.339 | 10.707 | 8.198 | 4.042 |
| *p* | **<0.001** | **<0.001** | **<0.001** | **0.018** |

**Table S2: *F* and *P* values derived from two-way ANOVA analysis for nitrogen (N) form, soil phosphorus (P) level, and their interaction on pH, organic content, effective phosphorus content, and magnesium oxide content of growth media at T2.** RS reflects rhizosphere soil, BS reflects bulk soil.

| **Sources** | **Value** | **pH** | | **Organic content**  **（g·kg-1）** | | **Total phosphorus content**  **(mg·kg-1)** | | **Effective phosphorus content**  **(mg·kg-1)** | | **Magnesium oxide content**  **（mg·kg-1）** | |
| --- | --- | --- | --- | --- | --- | --- | --- | --- | --- | --- | --- |
| **RS** | **BS** | **RS** | **BS** | **RS** | **BS** | **RS** | **BS** | **RS** | **BS** |
| N | *F* | 21.375 | 0.593 | 43.843 | 14.088 | 51.716 | 33.215 | 75.004 | 89.951 | 1.753 | 0.123 |
| *p* | **<0.001** | 0.626 | **<0.001** | **<0.001** | **<0.001** | **<0.001** | **<0.001** | **<0.001** | 0.183 | 0.945 |
| P | *F* | 1.043 | 2.004 | 10.876 | 0.089 | 11.6 | 2.838 | 32.573 | 55.161 | 0.043 | 1.469 |
| *p* | 0.317 | 0.170 | **0.003** | 0.768 | **0.002** | 0.105 | **<0.001** | **<0.001** | 0.837 | 0.237 |
| N*P | *F* | 65.78 | 27.514 | 10.582 | 1.958 | 9.264 | 5.548 | 6.079 | 4.210 | 11.013 | 8.908 |
| *p* | **<0.001** | **<0.001** | **<0.001** | 0.147 | **<0.001** | **0.005** | **0.003** | **0.016** | **<0.001** | **<0.001** |

**Table S3: *F* and *P* values derived from two-way ANOVA analysis for nitrogen (N) form, soil phosphorus (P) level, and their interaction on root length, surface area, volumetric and surface area of fine roots of Moso bamboo transplants at T2.**

| **Sources** | **Value** | **Length (cm)** | **Surface area (cm2)** | **Volumetric (cm3)** | **Surface area of fine root (cm2)** |
| --- | --- | --- | --- | --- | --- |
| N | *F* | 4.367 | 6.075 | 7.239 | 6.145 |
| *p* | **0.014** | **0.003** | **<0.001** | **0.003** |
| P | *F* | 194.523 | 254.605 | 233.755 | 254.203 |
| *p* | **<0.001** | **<0.001** | **<0.001** | **<0.001** |
| N*P | *F* | 2.816 | 4.353 | 4.658 | 4.273 |
| *p* | 0.061 | **0.014** | **0.011** | **0.015** |

**Table S4: *F* and *P* values derived from two-way ANOVA analysis for nitrogen (N) form, soil phosphorus (P) level, and their interaction on total amino acid content of roots, stems, and leaves of Moso bamboo seedlings.**

| **Sources** | **Value** | **Root (ug·g-1)** | **Stem (ug·g-1)** | **Leaf (ug·g-1)** |
| --- | --- | --- | --- | --- |
| N | *F* | 12.593 | 57.212 | 95.589 |
| *p* | **0.003** | **<0.001** | **<0.001** |
| P | *F* | 2.524 | 9.721 | 3.690 |
| *p* | 0.094 | **<0.001** | **0.034** |
| N*P | *F* | 0.955 | 6.964 | 7.814 |
| *p* | 0.438 | **0.003** | **0.002** |

**Table S5 Effects of nitrogen supply forms on amino acid fractions and ratios of roots, stems, and leaves of Moso bamboo seedlings under different levels of phosphorus application.** N1 refers to supply of NO3--N fertilizer, N2 refers to supply of NH4+-N fertilizer, N3 refers to combined supply of NO3--N and NH4+-N fertilizer, N4 refers to supply of organic N fertilizer; P1 refers to low-P condition, and P2 refers to high-P condition.

| **Tissue** | **Composition** | **ASN** | **ASP** | **gamma-GABA** | **GLU** | **SER** | **ALA** | **GLN** | **THR** |
| --- | --- | --- | --- | --- | --- | --- | --- | --- | --- |
| Root | N1P1 | 26.0±3.7a | 17.2±1.9a | 13.2±0.3abc | 6.3±0.3c | 10.9±0.4abc | 4.6±0.5b | 1.7±0.2d | 4.6±0.4bc |
| N2P1 | 14.3±0.4b | 17.4±1.8a | 9.4±0.3bcd | 9.7±0.8bc | 9.9±1.2ab | 3.9±0.9ab | 12.4±1.5a | 4.7±0.3ab |
| N3P1 | 11.3±0.3b | 14.4±0.9a | 7.6±0.2cd | 17.8±1.2a | 11.6±0.6a | 5.4±0.1b | 5.9±1.4b | 4.6±0.2a |
| N4P1 | 15.6±1.3b | 15.1±1.2a | 6.8±0.9d | 16.0±1.4b | 12.4±0.8ab | 4.5±0.1b | 7.5±0.7b | 4.6±0.3c |
| N1P2 | 14.5±2.0b | 21.2±2.8a | 16.2±0.8abc | 10.2±1.3c | 9.4±0.6c | 7.9±1.4b | 3.0±0.6cd | 3.3±0.3d |
| N2P2 | 18.7±1.1b | 16.6±2.5a | 12.5±0.7bcd | 11.3±1.1c | 9.2±0.0c | 6.9±0.7ab | 7.2±1.3bc | 3.1±0.4d |
| N3P2 | 17.8±0.6b | 15.2±3.1a | 16.2±1.3a | 8.9±2.2c | 9.7±0.8bc | 8.2±1.1a | 3.5±0.6bcd | 3.2±0.3d |
| N4P2 | 17.3±0.8b | 17.8±0.7a | 16.7±1.1ab | 10.4±2.3c | 10.0±0.4bc | 7.1±0.3ab | 4.0±1.5bcd | 3.0±0.2d |
| Stem | N1P1 | 7.2±1.7b | 15.7±1.3ab | 14.1±1.0ba | 3.5±0.2c | 11.2±0.3c | 6.5±0.3b | 6.2±1.1c | 3.7±0.2b |
| N2P1 | 14.9±2.4a | 5.4±0.6b | 7.9±0.7ab | 3.1±0.1ab | 10.5±1.2abc | 3.9±1.2b | 24.3±1.2b | 2.8±0.1a |
| N3P1 | 14.8±2.7a | 5.5±0.5ab | 7.6±0.6a | 5.2±0.5a | 9.0±0.7a | 2.7±0.3a | 25.2±2.9ab | 2.9±0.2a |
| N4P1 | 26.3±2.0a | 7.4±0.8a | 5.8±0.6ab | 6.1±0.3ab | 10.1±1.0abc | 3.6±0.1b | 10.1±1.3b | 3.3±0.2ab |
| N1P2 | 8.5±0.9a | 6.9±1.6b | 8.2±0.2ab | 5.1±0.7bc | 10.1±1.7ab | 7.5±1.8b | 27.3±1.6b | 2.3±0.2a |
| N2P2 | 10.6±1.0a | 8.6±1.1b | 6.8±0.2c | 3.9±1.1abc | 9.0±0.7bc | 3.1±0.2b | 29.8±1.7c | 2.3±0.2b |
| N3P2 | 9.9±1.3a | 9.3±2.0a | 8.2±0.7ab | 5.1±1.5abc | 7.9±0.5ab | 4.5±0.6b | 21.4±1.2a | 1.8±0.3a |
| N4P2 | 13.3±2.2a | 6.8±0.8ab | 9.2±1.0ab | 4.2±1.4abc | 9.5±1.6abc | 4.3±0.5b | 25.0±4.0b | 2.2±0.4ab |
| Leaf | N1P1 | 4.8±0.1c | 5.8±0.2bcd | 5.3±0.7c | 6.6±0.1b | 7.4±0.1d | 7.4±0.6c | 6.3±1.0b | 2.9±0.3de |
| N2P1 | 9.0±2.3bc | 4.4±0.7d | 6.1±0.6c | 6.5±0.5b | 8.3±0.6d | 5.7±0.4c | 8.9±0.7b | 2.5±0.2e |
| N3P1 | 8.4±1.3ab | 3.4±0.5ab | 8.2±0.9ab | 6.6±1.0a | 10.3±1.1bc | 7.2±0.4ab | 8.5±1.1b | 2.2±0.1b |
| N4P1 | 7.0±1.0a | 3.7±0.0abc | 6.9±0.7ab | 6.7±0.2ab | 10.2±0.3c | 5.7±0.1ab | 9.3±0.2b | 2.2±0.1bc |
| N1P2 | 10.8±2.8bc | 8.2±1.8cd | 10.6±0.7c | 8.7±1.0b | 11.4±0.9d | 9.3±0.9c | 9.8±0.0b | 2.5±0.2e |
| N2P2 | 16.1±3.4c | 7.8±0.7d | 10.2±1.3c | 6.9±1.0b | 15.9±2.0d | 7.6±0.5c | 11.5±0.8b | 2.2±0.1e |
| N3P2 | 15.3±0.6a | 7.0±1.8abc | 11.1±0.3b | 6.3±1.2ab | 11.1±1.1b | 9.3±1.1b | 12.5±2.6b | 2.1±0.3cd |
| N4P2 | 7.5±0.6abc | 8.3±1.8a | 9.7±1.3a | 4.9±0.8ab | 17.1±0.6a | 8.8±0.6a | 16.1±5.1a | 3.0±0.2a |
| **Tissue** | **Composition** | **ARG** | **LYS** | **TYR** | **GLY** | **TRP** | **HIS** | **VAL** | **LEU** |
| Root | N1P1 | 0.5±0.2c | 0.6±0.2ab | 1.1±0.1bcd | 1.1±0.0bc | 1.2±0.1bc | 1.6±0.2b | 2.0±0.1bc | 2.1±0.2a |
| N2P1 | 1.4±0.1abc | 0.9±0.2ab | 1.3±0.1a | 1.2±0.1b | 1.9±0.1a | 2.1±0.3a | 2.1±0.0a | 1.9±0.0a |
| N3P1 | 2.3±0.3a | 1.3±0.1a | 1.2±0.0ab | 2.0±0.2a | 1.9±0.1a | 2.1±0.1a | 1.9±0.0ab | 1.8±0.1a |
| N4P1 | 1.7±0.1ab | 1.2±0.1abc | 1.1±0.0cd | 1.5±0.1b | 1.4±0.1b | 1.8±0.1b | 1.7±0.1cd | 1.8±0.2a |
| N1P2 | 0.4±0.0c | 1.4±0.1cd | 1.5±0.1abcd | 1.1±0.1cd | 0.7±0.2e | 2.2±0.1b | 1.2±0.1ef | 1.3±0.2b |
| N2P2 | 1.4±0.4bc | 1.3±0.1d | 1.1±0.1d | 1.2±0.3cd | 0.9±0.2de | 2.0±0.2b | 1.2±0.3f | 1.2±0.3bc |
| N3P2 | 2.9±0.5a | 1.9±0.2aba | 1.4±0.0ab | 0.9±0.1cd | 1.0±0.2cd | 1.9±0.1b | 1.4±0.3de | 1.2±0.2b |
| N4P2 | 1.4±0.6bc | 1.7±0.2bcdc | 1.5±0.1abc | 0.8±0.2d | 0.6±0.2e | 1.6±0.2b | 1.1±0.1ef | 0.7±0.1c |
| Stem | N1P1 | 0.3±0.1b | 3.8±0.5c | 2.4±0.3ab | 1.9±0.1cd | 1.7±0.1b | 2.0±0.1d | 3.1±0.2a | 4.1±0.1a |
| N2P1 | 3.7±1.7ab | 2.2±0.3c | 1.2±0.1ab | 1.8±0.2ab | 3.0±0.9b | 2.7±0.6bc | 1.4±0.3b | 1.2±0.1b |
| N3P1 | 7.8±0.8ab | 1.9±0.1ab | 1.2±0.1ab | 1.6±0.2abc | 1.1±0.2b | 2.5±0.1a | 0.9±0.1ab | 1.0±0.1ab |
| N4P1 | 0.5±0.2a | 2.3±0.1a | 1.4±0.2a | 2.0±0.2d | 3.1±0.3b | 2.1±0.2ab | 1.9±0.1ab | 2.1±0.1b |
| N1P2 | 7.2±1.7ab | 2.7±0.4bc | 1.0±0.1ab | 1.1±0.2a | 1.2±0.2b | 3.4±0.4b | 1.2±0.1ab | 1.3±0.2b |
| N2P2 | 10.5±2.9b | 3.3±0.2c | 0.9±0.1b | 0.6±0.1bcd | 0.8±0.2a | 3.4±0.3cd | 0.9±0.2ab | 1.0±0.2b |
| N3P2 | 12.7±6.1a | 3.7±0.4a | 1.3±0.2ab | 0.6±0.2d | 1.0±0.2b | 2.5±0.5a | 1.1±0.3ab | 1.1±0.5b |
| N4P2 | 9.3±2.4ab | 3.5±0.2a | 1.1±0.1ab | 0.7±0.0d | 0.8±0.2b | 2.5±0.2bc | 1.3±0.1ab | 0.7±0.1b |
| Leaf | N1P1 | 1.0±0.4a | 6.2±0.5a | 2.7±0.3c | 2.8±0.3ab | 2.1±0.2abc | 2.2±0.1bcd | 2.9±0.4bcd | 5.0±0.5a |
| N2P1 | 0.5±0.1b | 2.9±0.2a | 1.7±0.1c | 2.8±0.3abc | 2.9±0.6a | 3.2±0.3a | 2.2±0.1a | 1.7±0.2b |
| N3P1 | 0.2±0.0ab | 3.5±0.4a | 2.3±0.1bc | 2.7±0.0c | 4.3±0.4bc | 4.2±0.3cd | 1.6±0.2cd | 2.3±0.3a |
| N4P1 | 0.3±0.1ab | 3.9±0.2a | 2.4±0.0c | 2.9±0.0bc | 3.7±0.4ab | 2.9±0.2d | 1.6±0.1d | 2.3±0.2b |
| N1P2 | 0.3±0.1ab | 6.1±0.9a | 2.4±0.4b | 1.4±0.1abc | 1.0±0.2bc | 1.2±0.2bcd | 2.3±0.3ab | 4.3±0.7b |
| N2P2 | 0.5±0.1b | 4.6±0.4a | 1.5±0.1c | 1.7±0.2abc | 0.8±0.1ab | 1.4±0.1ab | 1.3±0.1bcd | 2.3±0.2b |
| N3P2 | 0.4±0.0ab | 4.7±0.9a | 1.8±0.1bc | 1.7±0.1bc | 1.4±0.6c | 1.0±0.2cd | 1.8±0.3cd | 2.1±0.6b |
| N4P2 | 0.4±0.1ab | 7.0±1.3a | 1.9±0.5a | 1.6±0.1a | 1.0±0.0bc | 1.4±0.1abc | 2.0±0.6abc | 1.6±0.3b |
|  |  |  |  |  |  |  |  |  |  |

| **Tissue** | **Composition** | **ILE** | **PHE** | **ETH** | **PRO** | **ORN** | **MET** | **CIT** |
| --- | --- | --- | --- | --- | --- | --- | --- | --- |
| Root | N1P1 | 26.0±3.7a | 17.2±1.9a | 13.2±0.3abc | 6.3±0.3c | 10.9±0.4abc | 4.6±0.5b | 1.7±0.2d |
| N2P1 | 14.3±0.4b | 17.4±1.8a | 9.4±0.3bcd | 9.7±0.8bc | 9.9±1.2ab | 3.9±0.9ab | 12.4±1.5a |
| N3P1 | 11.3±0.3b | 14.4±0.9a | 7.6±0.2cd | 17.8±1.2a | 11.6±0.6a | 5.4±0.1b | 5.9±1.4b |
| N4P1 | 15.6±1.3b | 15.1±1.2a | 6.8±0.9d | 16.0±1.4b | 12.4±0.8ab | 4.5±0.1b | 7.5±0.7b |
| N1P2 | 14.5±2.0b | 21.2±2.8a | 16.2±0.8abc | 10.2±1.3c | 9.4±0.6c | 7.9±1.4b | 3.0±0.6cd |
| N2P2 | 18.7±1.1b | 16.6±2.5a | 12.5±0.7bcd | 11.3±1.1c | 9.2±0.0c | 6.9±0.7ab | 7.2±1.3bc |
| N3P2 | 17.8±0.6b | 15.2±3.1a | 16.2±1.3a | 8.9±2.2c | 9.7±0.8bc | 8.2±1.1a | 3.5±0.6bcd |
| N4P2 | 17.3±0.8b | 17.8±0.7a | 16.7±1.1ab | 10.4±2.3c | 10.0±0.4bc | 7.1±0.3ab | 4.0±1.5bcd |
| Stem | N1P1 | 7.2±1.7a | 15.7±1.3a | 14.1±1.0c | 3.5±0.2a | 11.2±0.3c | 6.5±0.3bcd | 6.2±1.1a |
| N2P1 | 14.9±2.4a | 5.4±0.6bc | 7.9±0.7a | 3.1±0.1a | 10.5±1.2c | 3.9±1.2d | 24.3±1.2a |
| N3P1 | 14.8±2.7a | 5.5±0.5abc | 7.6±0.6c | 5.2±0.5a | 9.0±0.7ab | 2.7±0.3a | 25.2±2.9a |
| N4P1 | 26.3±2.0a | 7.4±0.8bc | 5.8±0.6c | 6.1±0.3a | 10.1±1.0a | 3.6±0.1ab | 10.1±1.3a |
| N1P2 | 8.5±0.9a | 6.9±1.6ab | 8.2±0.2a | 5.1±0.7a | 10.1±1.7bc | 7.5±1.8abcd | 27.3±1.6a |
| N2P2 | 10.6±1.0a | 8.6±1.1bc | 6.8±0.2b | 3.9±1.1a | 9.0±0.7c | 3.1±0.2cd | 29.8±1.7a |
| N3P2 | 9.9±1.3a | 9.3±2.0c | 8.2±0.7c | 5.1±1.5a | 7.9±0.5a | 4.5±0.6abc | 21.4±1.2a |
| N4P2 | 13.3±2.2a | 6.8±0.8bc | 9.2±1.0c | 4.2±1.4a | 9.5±1.6a | 4.3±0.5abc | 25.0±4.0a |
| Leaf | N1P1 | 4.8±0.1abc | 5.8±0.2ab | 5.3±0.7ab | 6.6±0.1ab | 7.4±0.1ab | 7.4±0.6ab | 6.3±1.0a |
| N2P1 | 9.0±2.3bc | 4.4±0.7bc | 6.1±0.6c | 6.5±0.5c | 8.3±0.6c | 5.7±0.4b | 8.9±0.7a |
| N3P1 | 8.4±1.3ab | 3.4±0.5a | 8.2±0.9d | 6.6±1.0bc | 10.3±1.1bc | 7.2±0.4a | 8.5±1.1a |
| N4P1 | 7.0±1.0abc | 3.7±0.0abc | 6.9±0.7d | 6.7±0.2a | 10.2±0.3a | 5.7±0.1ab | 9.3±0.2a |
| N1P2 | 10.8±2.8c | 8.2±1.8c | 10.6±0.7a | 8.7±1.0bc | 11.4±0.9bc | 9.3±0.9b | 9.8±0.0a |
| N2P2 | 16.1±3.4abc | 7.8±0.7abc | 10.2±1.3bc | 6.9±1.0bc | 15.9±2.0bc | 7.6±0.5b | 11.5±0.8a |
| N3P2 | 15.3±0.6bc | 7.0±1.8bc | 11.1±0.3d | 6.3±1.2bc | 11.1±1.1bc | 9.3±1.1b | 12.5±2.6a |
| N4P2 | 7.5±0.6a | 8.3±1.8abc | 9.7±1.3d | 4.9±0.8abc | 17.1±0.6abc | 8.8±0.6a | 16.1±5.1a |
